# Supplementary material for: Children's activity and diet behaviours in the summer holidays versus school year
Source: PubMed Central journal article supplement (PMC10909460; doi:10.1111/ijpo.13029), 2023-03-21
Supplement: IJPO-18-e13029-s001.pdf [file IJPO-18-e13029-s001.pdf]

**Title:**

Children's activity and diet behaviours in the summer holidays versus school year

**Authors:**

Amanda WATSON, University of South Australia, School of Health Sciences, GPO Box 2471, Adelaide SA 5001, [amanda.watson@unisa.edu.au]

Carol MAHER, University of South Australia, School of Health Sciences, GPO Box 2471, Adelaide SA 5001, [Carol.Maher@unisa.edu.au]

Rebecca Golley, Flinders University, College of Nursing and Health Sciences, Adelaide SA 5001, [rebecca.golley@flinders.edu.au]

Dot Dumuid, University of South Australia, School of Health Sciences, GPO Box 2471, Adelaide SA 5001, [Dot.Dumuid@unisa.edu.au]

Alexandra MANSON, Flinders University, College of Nursing and Health Sciences, Adelaide SA 5001, [alexandra.manson@flinders.edu.au]

Grant Tomkinson, University of South Australia, School of Health Sciences, GPO Box 2471, Adelaide SA 5001, [grant.tomkinson@unisa.edu.au]

Francois Fraysse, University of South Australia, School of Health Sciences, GPO Box 2471, Adelaide SA 5001, [Francois.Fraysse@unisa.edu.au]

Tim OLDS, University of South Australia, School of Health Sciences, GPO Box 2471, Adelaide SA 5001, [Timothy.Olds@unisa.edu.au]



|                                     |    |   |    |   |    |    |    |    |       |
|-------------------------------------|----|---|----|---|----|----|----|----|-------|
| Grains (# of serves)                | 5  | 2 | 4  | 1 | 4  | 2  | 4  | 2  | 0.104 |
| Meats & alternatives (# of serves)  | 2  | 1 | 1  | 1 | 2  | 1  | 1  | 1  | 0.885 |
| Dairy (# of serves)                 | 2  | 1 | 1  | 1 | 2  | 1  | 1  | 1  | 0.941 |
| Discretionary choices (# of serves) | 5  | 3 | 5  | 2 | 6  | 3  | 6  | 4  | 0.505 |
| Diet quality (/score 100)           | 41 | 8 | 37 | 9 | 37 | 14 | 34 | 12 | 1.000 |

Bold text denotes statistical significance  $p < 0.05$

Activity values are in min/day, except for counts.

**Supplementary Table 2: Activity and diet behaviours in summer holidays relative to school time reported separately for low-, middle- and high-SEP bands**

|                     | School     |           |               |           |             |           | Summer holidays |           |               |           |             |           | p-value<br>mid vs. low | p-value<br>high vs. low |
|---------------------|------------|-----------|---------------|-----------|-------------|-----------|-----------------|-----------|---------------|-----------|-------------|-----------|------------------------|-------------------------|
|                     | Low (n=26) |           | Middle (n=65) |           | High (n=42) |           | Low (n=26)      |           | Middle (n=65) |           | High (n=42) |           |                        |                         |
| <b>MARCA</b>        | Mean       | SD        | Mean          | SD        | Mean        | SD        | Mean            | SD        | Mean          | SD        | Mean        | SD        |                        |                         |
| Domestic/social     | 61         | 42        | 63            | 38        | 57          | 47        | 93              | 84        | 116           | 104       | 97          | 86        | 0.303                  | 0.621                   |
| Screen              | 223        | 76        | 192           | 102       | 154         | 91        | 296             | 122       | 274           | 154       | 213         | 120       | 0.934                  | 0.532                   |
| Physical activity   | 136        | 50        | 157           | 62        | 142         | 62        | 128             | 110       | 124           | 96        | 145         | 100       | 0.340                  | 0.742                   |
| School-related      | <b>197</b> | <b>78</b> | 196           | 96        | <b>264</b>  | <b>84</b> | <b>47</b>       | <b>81</b> | 57            | 58        | <b>65</b>   | <b>69</b> | 0.877                  | <b>0.046</b>            |
| Self-care           | 98         | 18        | 110           | 20        | 108         | 20        | 125             | 49        | 128           | 34        | 138         | 37        | 0.429                  | 0.687                   |
| Passive transport   | 34         | 19        | 41            | 25        | 34          | 19        | 69              | 140       | 51            | 39        | 65          | 56        | 0.210                  | 0.949                   |
| Quiet time          | <b>59</b>  | <b>25</b> | 62            | 32        | <b>56</b>   | <b>27</b> | <b>58</b>       | <b>70</b> | 69            | 69        | <b>97</b>   | <b>80</b> | 0.616                  | <b>0.019</b>            |
| Sleep               | 632        | 76        | 618           | 43        | 625         | 47        | 624             | 128       | 632           | 81        | 621         | 63        | 0.387                  | 0.982                   |
| <b>GENEActiv</b>    | Low (n=28) |           | Middle (n=67) |           | High (n=38) |           | Low (n=28)      |           | Middle (n=67) |           | High (n=38) |           |                        |                         |
| Sleep               | 550        | 29        | 568           | 27        | 564         | 28        | 539             | 551       | 557           | 39        | 547         | 39        | 0.960                  | 0.573                   |
| Sedentary           | 536        | 75        | 507           | 62        | 505         | 73        | 559             | 110       | 546           | 88        | 521         | 100       | 0.163                  | 0.970                   |
| LPA                 | 282        | 57        | 290           | 47        | 289         | 52        | 275             | 89        | 279           | 72        | 302         | 68        | 0.943                  | 0.084                   |
| MVPA                | <b>73</b>  | <b>23</b> | <b>78</b>     | <b>29</b> | 85          | 29        | <b>78</b>       | <b>60</b> | <b>61</b>     | <b>39</b> | 71          | 38        | <b>0.016</b>           | 0.068                   |
| Total counts        | 264665     | 42557     | 271159        | 43674     | 279665      | 49970     | 233408          | 56979     | 229413        | 44931     | 248573      | 52822     | 0.317                  | 0.962                   |
| <b>Diet</b>         | Low (n=21) |           | Middle (n=67) |           | High (n=40) |           | Low (n=21)      |           | Middle (n=67) |           | High (n=40) |           |                        |                         |
| Energy (kJ)         | 7989       | 1632      | 8425          | 8107      | 7746        | 1578      | 8312            | 3300      | 8025          | 2614      | 8453        | 2283      | 0.347                  | 0.458                   |
| Protein (g)         | 72         | 25        | 80            | 26        | 75          | 20        | 79              | 35        | 75            | 25        | 76          | 25        | 0.138                  | 0.501                   |
| Total fat (g)       | 74         | 24        | 77            | 19        | 69          | 19        | 81              | 41        | 77            | 20        | 82          | 31        | 0.482                  | 0.419                   |
| Carbohydrate (g)    | 231        | 38        | 241           | 56        | 223         | 54        | 230             | 89        | 224           | 80        | 235         | 65        | 0.527                  | 0.339                   |
| Fruit (# of serves) | 1          | 1         | 2             | 1         | 2           | 1         | 1               | 1         | 1             | 1         | 2           | 2         | 0.886                  | 0.191                   |

|                                     |    |   |    |   |    |   |    |    |    |    |    |    |       |       |
|-------------------------------------|----|---|----|---|----|---|----|----|----|----|----|----|-------|-------|
| Vegetables & legumes (# of serves)  | 2  | 1 | 3  | 2 | 3  | 1 | 1  | 1  | 2  | 2  | 3  | 2  | 0.468 | 0.442 |
| Grains (# of serves)                | 4  | 1 | 4  | 2 | 4  | 2 | 4  | 2  | 4  | 3  | 4  | 2  | 0.467 | 0.424 |
| Meats & alternatives (# of serves)  | 1  | 1 | 1  | 1 | 1  | 1 | 1  | 1  | 1  | 1  | 1  | 1  | 0.308 | 0.324 |
| Dairy (# of serves)                 | 1  | 1 | 1  | 1 | 2  | 1 | 1  | 1  | 1  | 1  | 2  | 1  | 0.197 | 0.299 |
| Discretionary choices (# of serves) | 6  | 2 | 6  | 2 | 4  | 2 | 7  | 6  | 5  | 3  | 6  | 3  | 0.792 | 0.098 |
| Diet quality (/score 100)           | 33 | 9 | 39 | 7 | 41 | 9 | 30 | 14 | 35 | 13 | 37 | 13 | 0.750 | 0.512 |

Bold text denotes statistical significance  $p < 0.05$

Activity values are in min/day, except for counts.

**Supplementary Table 3: Activity and diet behaviours in summer holidays relative to school time reported separately for normal weight and overweight/obese categories**

|                     | School                |           |                         |           | Summer holidays       |            |                         |            | p-value      |
|---------------------|-----------------------|-----------|-------------------------|-----------|-----------------------|------------|-------------------------|------------|--------------|
|                     | Normal weight (n=107) |           | Overweight/obese (n=26) |           | Normal weight (n=107) |            | Overweight/obese (n=26) |            |              |
| <b>MARCA</b>        | Mean                  | SD        | Mean                    | SD        | Mean                  | SD         | Mean                    | SD         |              |
| Domestic/social     | 60                    | 42        | 63                      | 40        | 110                   | 98         | 88                      | 83         | 0.168        |
| Screen              | <b>179</b>            | <b>98</b> | <b>215</b>              | <b>85</b> | <b>266</b>            | <b>148</b> | <b>232</b>              | <b>104</b> | <b>0.019</b> |
| Physical activity   | 151                   | 62        | 138                     | 49        | 126                   | 92         | 153                     | 127        | 0.074        |
| School-related      | 220                   | 96        | 207                     | 84        | 56                    | 71         | 39                      | 41         | 0.989        |
| Self-care           | 108                   | 20        | 102                     | 18        | 128                   | 39         | 138                     | 37         | 0.075        |
| Passive transport   | 36                    | 23        | 40                      | 20        | 53                    | 47         | 82                      | 136        | 0.190        |
| Quiet time          | 60                    | 30        | 59                      | 27        | 74                    | 70         | 83                      | 89         | 0.467        |
| Sleep               | 625                   | 49        | 615                     | 64        | 627                   | 86         | 625                     | 95         | 0.974        |
| <b>GENEActiv</b>    | Normal weight (n=103) |           | Overweight/obese (n=30) |           | Normal weight (n=103) |            | Overweight/obese (n=30) |            |              |
| Sleep               | 565                   | 29        | 557                     | 27        | 551                   | 42         | 547                     | 43         | 0.643        |
| Sedentary           | <b>514</b>            | <b>72</b> | <b>509</b>              | <b>57</b> | <b>549</b>            | <b>101</b> | <b>507</b>              | <b>71</b>  | <b>0.014</b> |
| LPA                 | <b>283</b>            | <b>51</b> | <b>304</b>              | <b>45</b> | <b>274</b>            | <b>74</b>  | <b>321</b>              | <b>67</b>  | <b>0.013</b> |
| MVPA                | 81                    | 28        | 73                      | 26        | 68                    | 41         | 67                      | 54         | 0.689        |
| Total counts        | 273883                | 47050     | 266506                  | 38900     | 233595                | 50053      | 243053                  | 51062      | 0.084        |
| <b>Diet</b>         | Normal weight (n=102) |           | Overweight/obese (n=26) |           | Normal weight (n=102) |            | Overweight/obese (n=26) |            |              |
| Energy (kJ)         | 8147                  | 1774      | 8121                    | 1548      | 8070                  | 2508       | 8736                    | 3047       | 0.344        |
| Protein (g)         | 77                    | 25        | 79                      | 21        | 76                    | 26         | 79                      | 29         | 0.970        |
| Total fat (g)       | 74                    | 20        | 75                      | 21        | 77                    | 31         | 86                      | 39         | 0.353        |
| Carbohydrate (g)    | 235                   | 55        | 229                     | 45        | 225                   | 74         | 240                     | 88         | 0.337        |
| Fruit (# of serves) | 2                     | 1         | 2                       | 1         | 1                     | 1          | 1                       | 1          | 0.694        |

|                                     |          |          |          |          |          |          |          |          |              |
|-------------------------------------|----------|----------|----------|----------|----------|----------|----------|----------|--------------|
| Vegetables & legumes (# of serves)  | 3        | 2        | 3        | 1        | 2        | 2        | 2        | 2        | 0.602        |
| Grains (# of serves)                | 4        | 2        | 4        | 2        | 4        | 2        | 4        | 3        | 0.720        |
| Meats & alternatives (# of serves)  | <b>1</b> | <b>1</b> | <b>2</b> | <b>1</b> | <b>1</b> | <b>1</b> | <b>1</b> | <b>1</b> | <b>0.042</b> |
| Dairy (# of serves)                 | 2        | 1        | 1        | 1        | 2        | 1        | 1        | 1        | 0.542        |
| Discretionary choices (# of serves) | <b>5</b> | <b>2</b> | <b>5</b> | <b>2</b> | <b>5</b> | <b>3</b> | <b>7</b> | <b>5</b> | <b>0.048</b> |
| Diet quality (/score 100)           | 39       | 9        | 37       | 9        | 36       | 13       | 32       | 13       | 0.507        |

Bold text denotes statistical significance  $p < 0.05$

Activity values are in min/day, except for counts.

**Supplementary Table 4: Activity and diet behaviours in summer holidays relative to school time reported separately for pubertal categories**

|                   | School              |       |                       |       |                      |       | Summer holidays     |        |                       |       |                      |       | p-value pre- vs. early pubertal | p-value pre- vs. mid pubertal+ |
|-------------------|---------------------|-------|-----------------------|-------|----------------------|-------|---------------------|--------|-----------------------|-------|----------------------|-------|---------------------------------|--------------------------------|
|                   | Pre-pubertal (n=80) |       | Early pubertal (n=29) |       | Mid pubertal+ (n=24) |       | Pre-pubertal (n=80) |        | Early pubertal (n=29) |       | Mid pubertal+ (n=24) |       |                                 |                                |
| <b>MARCA</b>      | Mean                | SD    | Mean                  | SD    | Mean                 | SD    | Mean                | SD     | Mean                  | SD    | Mean                 | SD    |                                 |                                |
| Domestic/social   | 53                  | 38    | 78                    | 47    | 65                   | 40    | 91                  | 84     | 147                   | 102   | 105                  | 109   | 0.057                           | 0.661                          |
| Screen            | 189                 | 95    | 191                   | 94    | 173                  | 108   | 274                 | 151    | 244                   | 129   | 228                  | 116   | 0.401                           | 0.754                          |
| Physical activity | 149                 | 64    | 145                   | 64    | 148                  | 39    | 137                 | 98     | 123                   | 90    | 124                  | 119   | 0.500                           | 0.333                          |
| School-related    | 226                 | 90    | 185                   | 92    | 229                  | 103   | 62                  | 77     | 32                    | 39    | 47                   | 47    | 0.562                           | 0.608                          |
| Self-care         | 108                 | 22    | 105                   | 15    | 105                  | 20    | 134                 | 39     | 124                   | 39    | 127                  | 37    | 0.532                           | 0.799                          |
| Passive transport | 36                  | 20    | 38                    | 20    | 40                   | 33    | 54                  | 45     | 71                    | 50    | 62                   | 145   | 0.436                           | 0.919                          |
| Quiet time        | 57                  | 32    | 65                    | 24    | 61                   | 26    | 75                  | 65     | 79                    | 92    | 74                   | 80    | 0.928                           | 0.934                          |
| Sleep             | 621                 | 49    | 634                   | 45    | 618                  | 67    | 615                 | 67     | 619                   | 84    | 674                  | 128   | 0.361                           | 0.023                          |
| <b>GENEActiv</b>  | Pre-pubertal (n=80) |       | Early pubertal (n=25) |       | Mid pubertal+ (n=28) |       | Pre-pubertal (n=80) |        | Early pubertal (n=25) |       | Mid pubertal+ (n=28) |       |                                 |                                |
| Sleep             | 566                 | 28    | 556                   | 27    | 562                  | 32    | 554                 | 42     | 541                   | 46    | 548                  | 40    | 0.711                           | 0.736                          |
| Sedentary         | 508                 | 67    | 510                   | 64    | 529                  | 78    | 539                 | 100    | 526                   | 79    | 554                  | 101   | 0.652                           | 0.697                          |
| LPA               | 286                 | 50    | 304                   | 52    | 280                  | 50    | 280                 | 74     | 301                   | 74    | 281                  | 80    | 0.913                           | 0.983                          |
| MVPA              | 84                  | 29    | 73                    | 23    | 72                   | 26    | 69                  | 40     | 72                    | 56    | 59                   | 44    | 0.162                           | 0.922                          |
| Total counts      | 279365              | 44725 | 270801                | 11474 | 253069               | 43754 | 235990              | 483956 | 437710                | 58595 | 227854               | 48099 | 0.298                           | 0.556                          |
| <b>Diet</b>       | Pre-pubertal (n=79) |       | Early pubertal (n=27) |       | Mid pubertal+ (n=22) |       | Pre-pubertal (n=79) |        | Early pubertal (n=27) |       | Mid pubertal+ (n=22) |       |                                 |                                |
| Energy (kJ)       | 8113                | 1929  | 8056                  | 1481  | 8348                 | 1184  | 8187                | 2169   | 9063                  | 3706  | 7218                 | 2303  | 0.097                           | 0.088                          |
| Protein (g)       | 77                  | 28    | 73                    | 19    | 81                   | 15    | 77                  | 27     | 77                    | 26    | 71                   | 28    | 0.683                           | 0.130                          |
| Total fat (g)     | 73                  | 21    | 74                    | 19    | 78                   | 16    | 79                  | 28     | 86                    | 45    | 70                   | 30    | 0.339                           | 0.219                          |



|                                     |            |           |            |           |     |    |            |           |            |            |     |    |              |       |
|-------------------------------------|------------|-----------|------------|-----------|-----|----|------------|-----------|------------|------------|-----|----|--------------|-------|
| Carbohydrate (g)                    | <b>234</b> | <b>57</b> | <b>234</b> | <b>50</b> | 232 | 40 | <b>225</b> | <b>64</b> | <b>264</b> | <b>109</b> | 195 | 57 | <b>0.020</b> | 0.085 |
| Fruit (# of serves)                 | 2          | 1         | 1          | 1         | 2   | 1  | 1          | 2         | 1          | 1          | 1   | 1  | 0.864        | 0.198 |
| Vegetables & legumes (# of serves)  | 3          | 1         | 2          | 2         | 3   | 2  | 2          | 2         | 2          | 2          | 2   | 3  | 0.984        | 0.842 |
| Grains (# of serves)                | 5          | 2         | 4          | 1         | 4   | 1  | 4          | 2         | 4          | 2          | 3   | 2  | 0.762        | 0.071 |
| Meats & alternatives (# of serves)  | 1          | 1         | 1          | 1         | 2   | 1  | 1          | 1         | 1          | 1          | 1   | 1  | 0.440        | 0.964 |
| Dairy (# of serves)                 | 2          | 1         | 1          | 1         | 1   | 1  | 2          | 1         | 1          | 1          | 1   | 1  | 0.336        | 0.971 |
| Discretionary choices (# of serves) | 5          | 2         | 6          | 3         | 6   | 2  | 5          | 3         | 8          | 6          | 5   | 4  | 0.110        | 0.413 |
| Diet quality (/score 100)           | 39         | 8         | 37         | 10        | 38  | 9  | 36         | 12        | 32         | 15         | 36  | 12 | 0.674        | 0.757 |

Bold text denotes statistical significance  $p < 0.05$

Activity values are in min/day, except for counts.
